# Supplementary material for: Development and Clinical Application of a Rapid and Sensitive Loop-Mediated Isothermal Amplification Test for SARS-CoV-2 Infection
Source: PubMed Central journal article supplement (PMC7449630; doi:10.1128/msphere.00808-20), 2020-08-26

**A**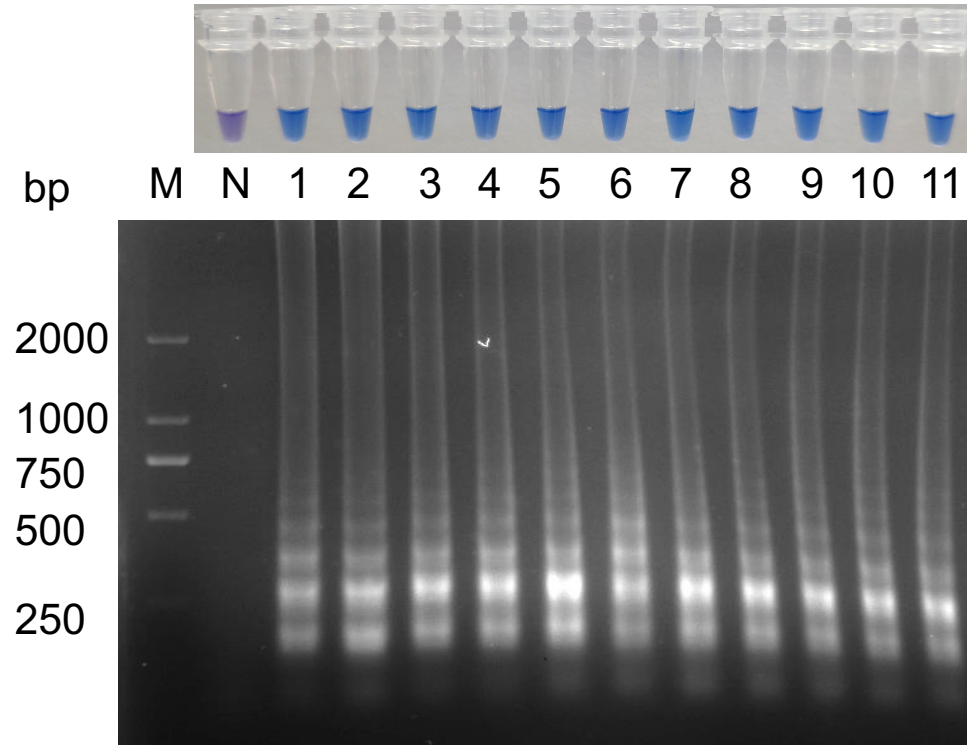**B**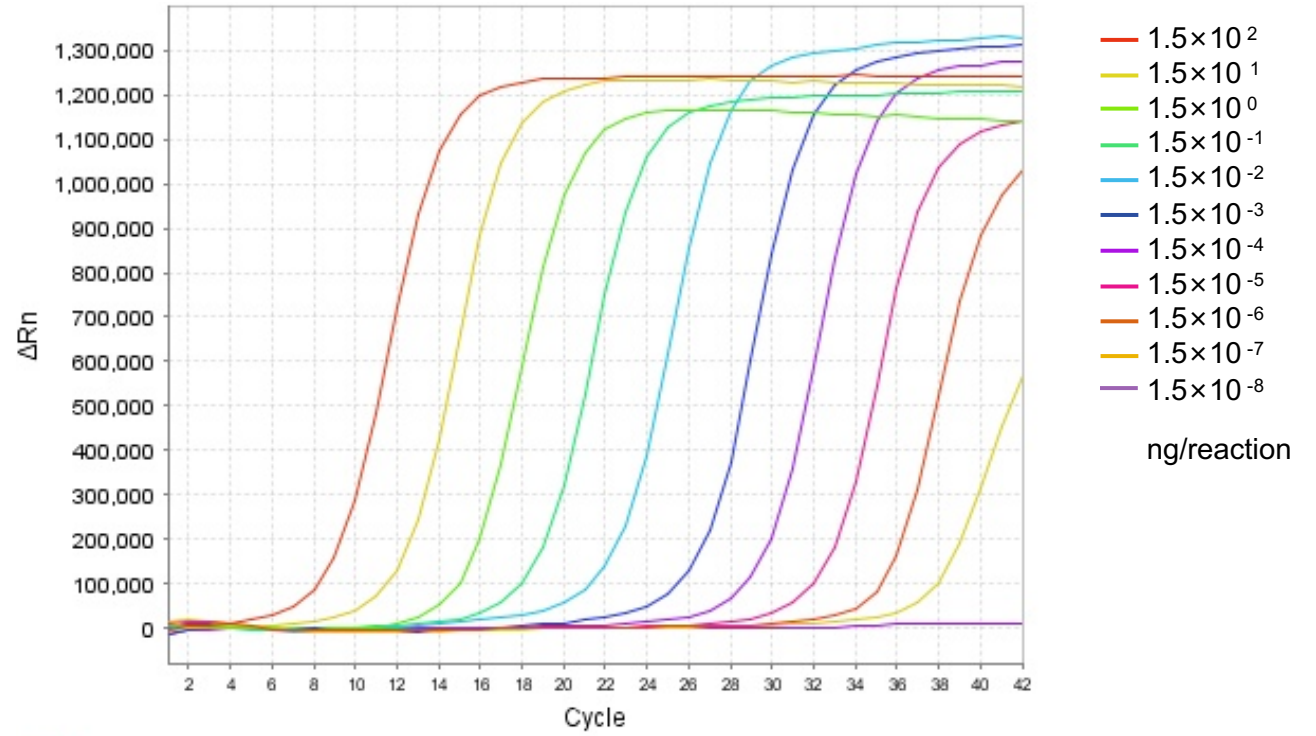

Supplement: mSphere.00808-20-sf005.pdf [file mSphere.00808-20-sf005.pdf]
